# Supplementary material for: Identification of Candidate Genes Associated With Prognosis in Glioblastoma
Source: PubMed Central journal article supplement (PMC9302577; doi:10.3389/fnmol.2022.913328), 2022-07-07
Supplement: Data_Sheet_1.pdf [file Data_Sheet_1.pdf]

## Supplementary figures

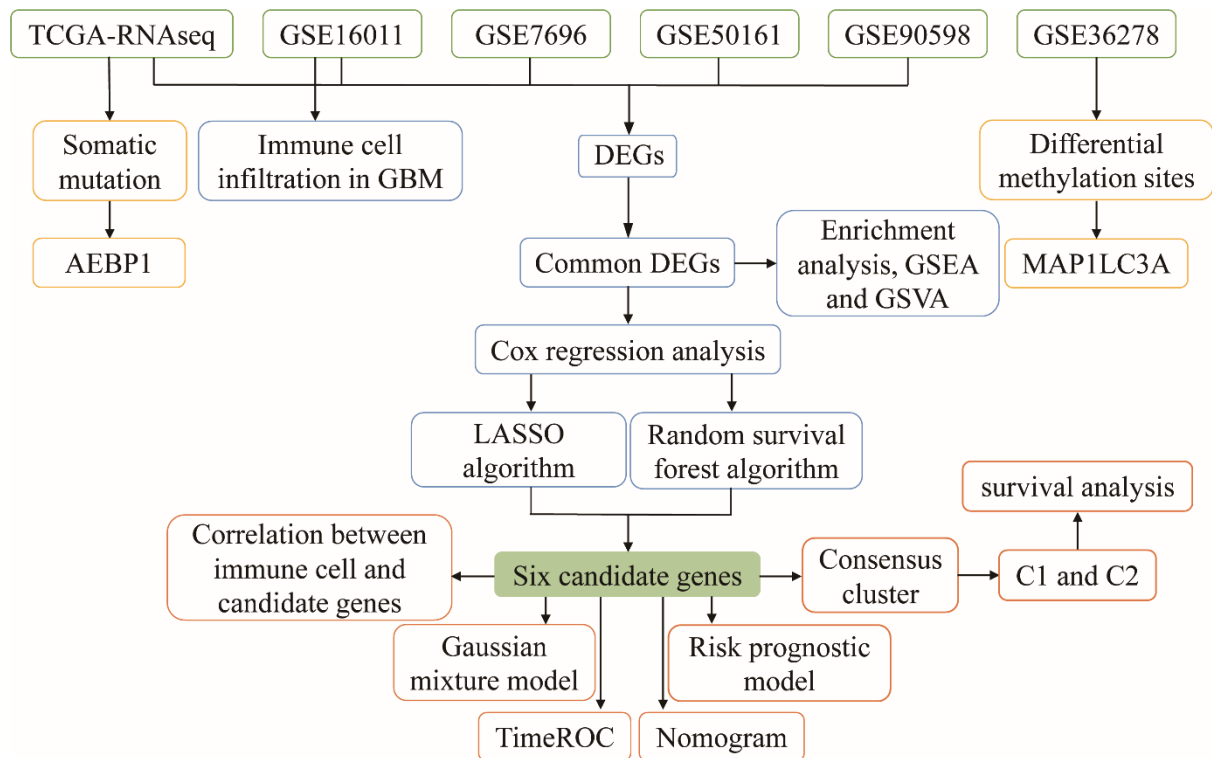

**Figure S1.** Flow diagram of this study. C1: class 1; C2: class 2; DEG, differentially expressed gene; GBM, glioblastoma; GSEA: gene set enrichment analysis; GSVA: gene set variation analysis; LASSO: least absolute shrinkage and selection operator; ROC: receiver operating characteristic curve; TCGA, The Cancer Genome Atlas.

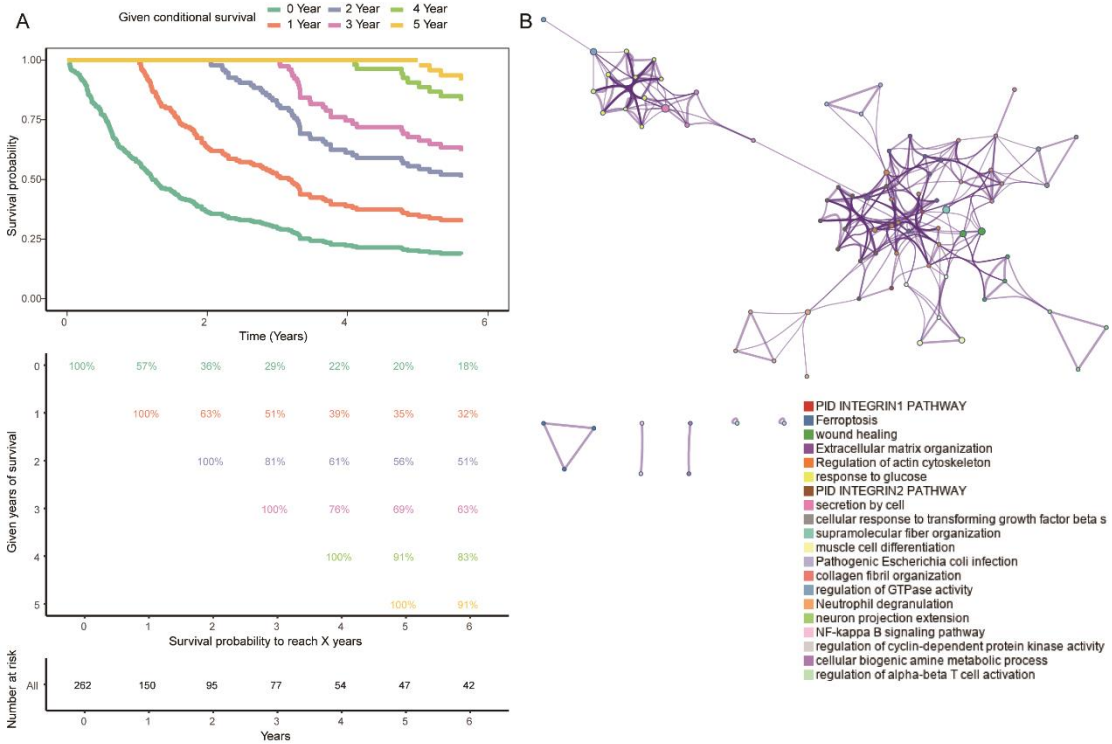

**Figure S2. A.** Overall survival of GBM patients in the GSE16011 dataset. **B.** Potential biological functions of prognosis - related genes in GBM, based on Metascape analysis.

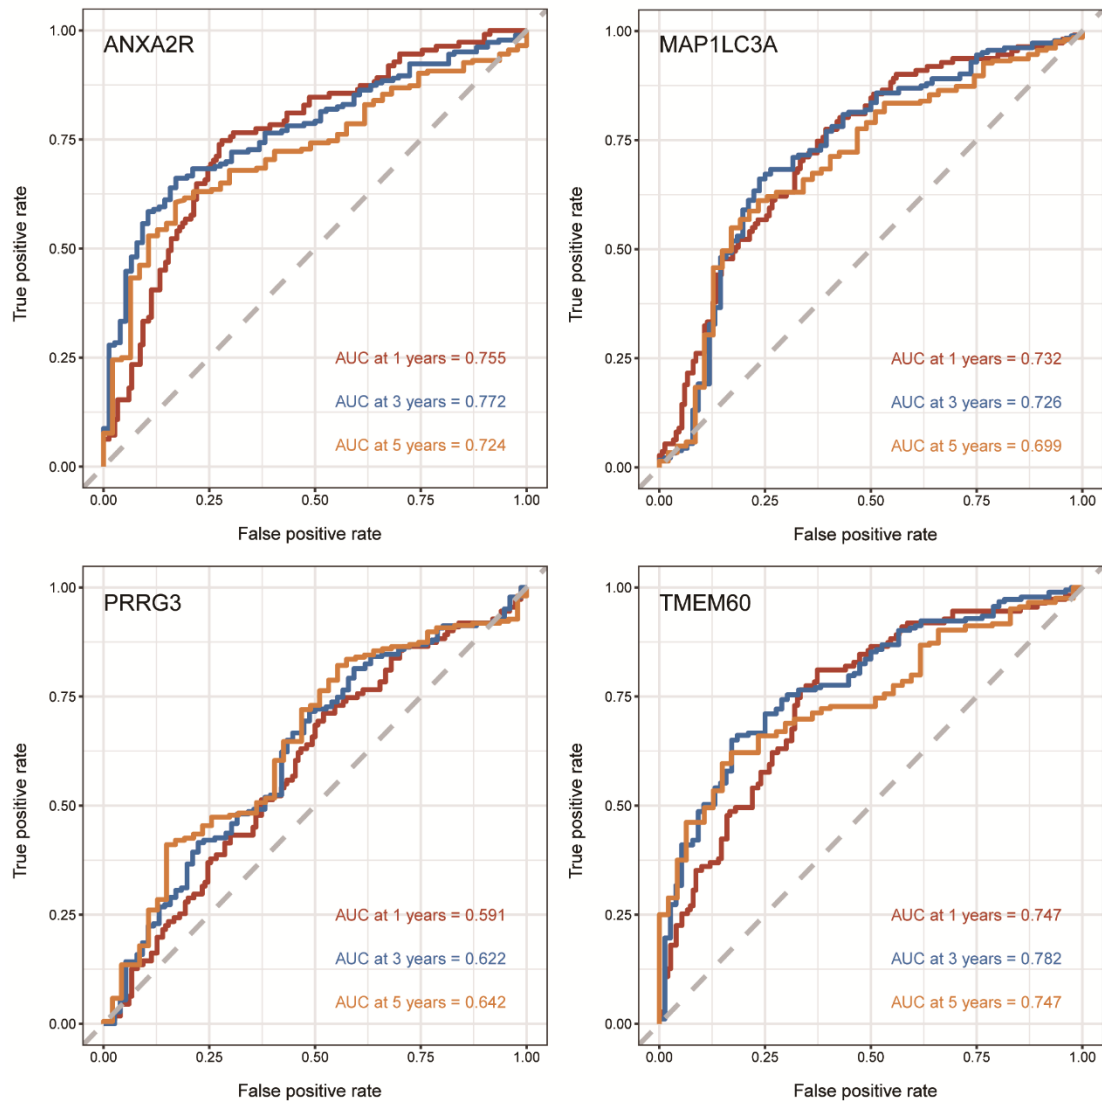

**Figure S3.** Receiver operating characteristic curves to assess the ability of candidate genes to predict overall survival at one, three, and five years. AUC, area under the receiver operating characteristic curve.

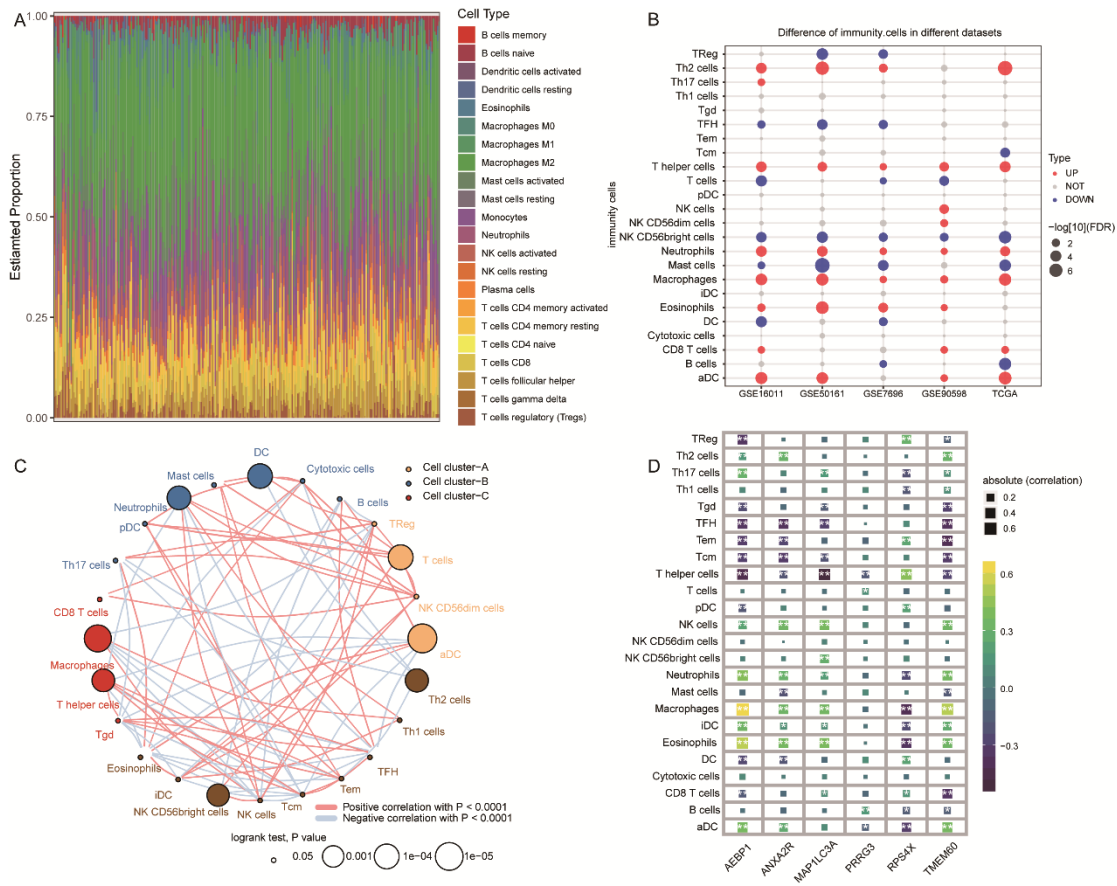

**Figure S4.** Relationship between immune cell infiltration and candidate genes in GBM. **A.** Proportions of 21 immune cell types, as detected by the CIBERSORT algorithm in GBM patients of the GSE16011 dataset. **B.** Differences in infiltration levels of 24 immune cell types between GBM patients and controls in the datasets GSE16011, GSE7696, GSE50161, GSE90598, and TCGA. **C.** Correlation and clustering results of infiltrating immune cells. **D.** Correlations between candidate genes and infiltrating immune cells. \*  $P < 0.05$ , \*\*  $P < 0.01$ .

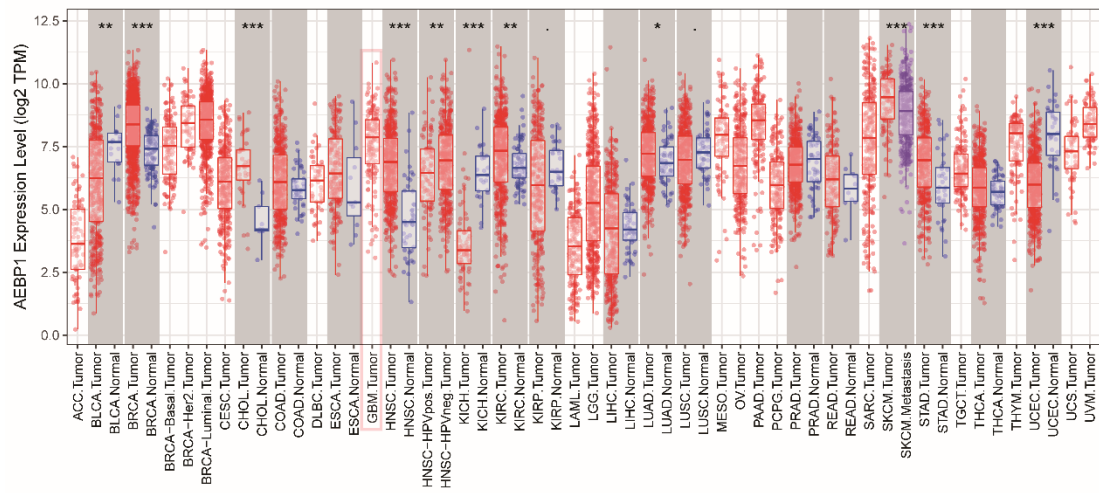

**Figure S5.** AEBP1 expression in the TIMER database. TPM, transcripts per million. \*  $P < 0.05$ , \*\*  $P < 0.01$ , \*\*\*  $P < 0.001$ .

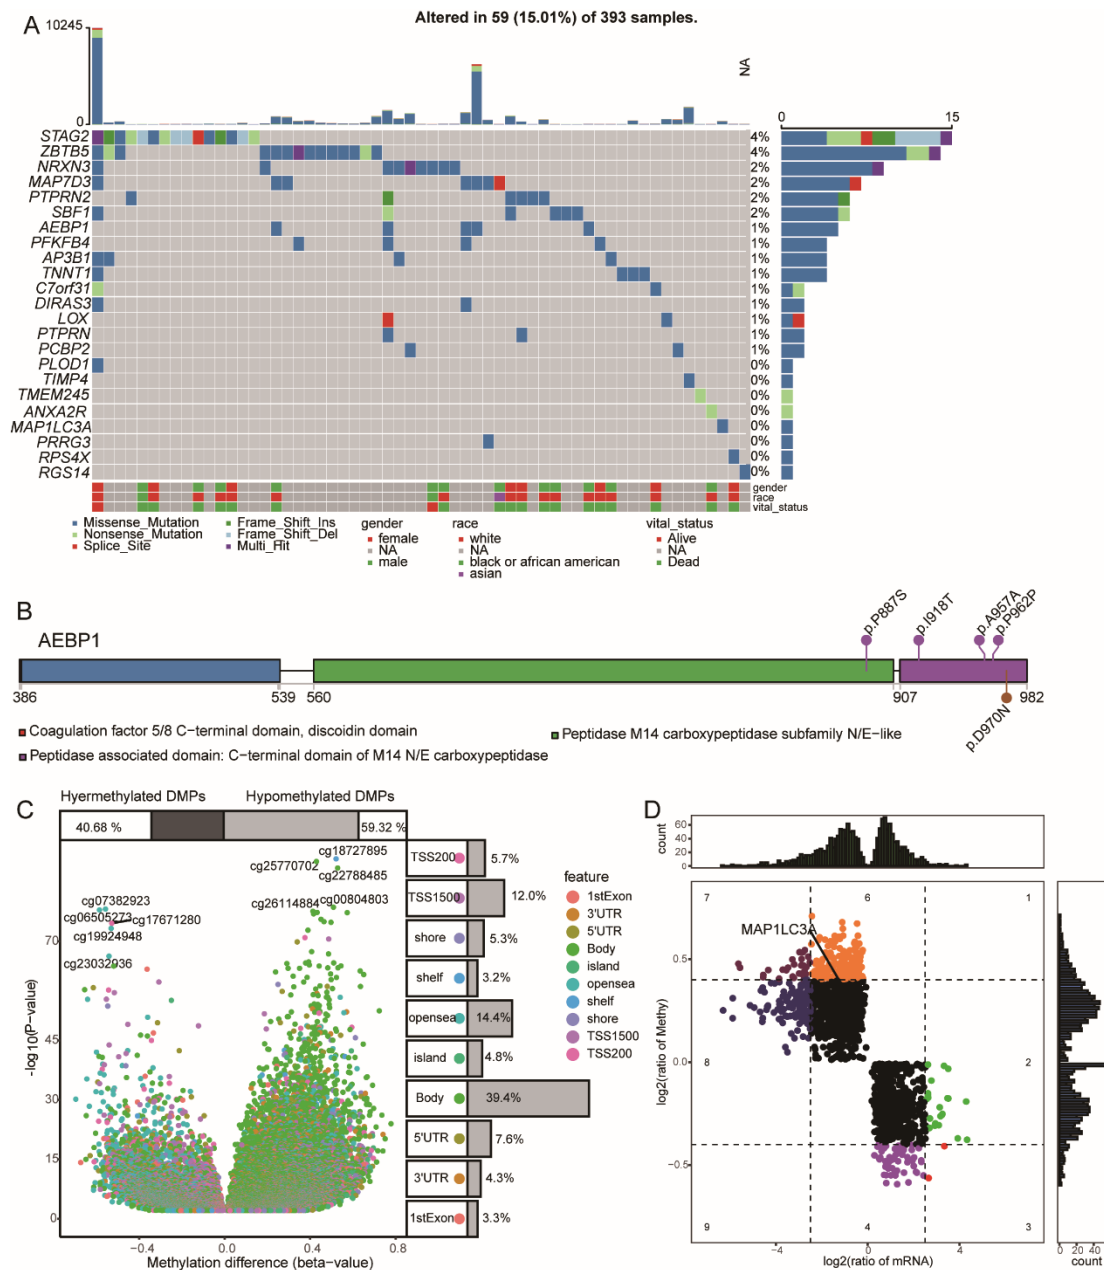

**Figure S6.** Landscape of mutations and methylation in candidate genes in GBM. **A.** The top 20 somatic mutations of GBM in TCGA. **B.** Mutation spectrum of AEBP1 in GBM patients. **C.** Differentially methylated probes (DMPs) between GBM patients and controls in TCGA dataset. **D.** DBeta and expression of DMPs.
